# Supplementary material
Source: Springer Nature journal article supplement (https://www.springermedizin.de/resource/supplementary/12967_2009_346_MOESM4_ESM.pdf/9576268)

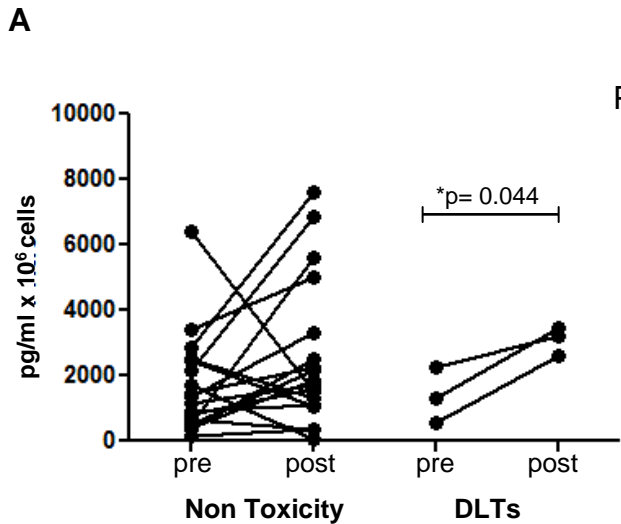

PBMC

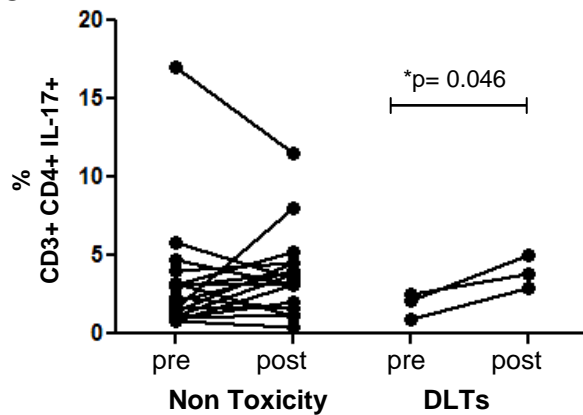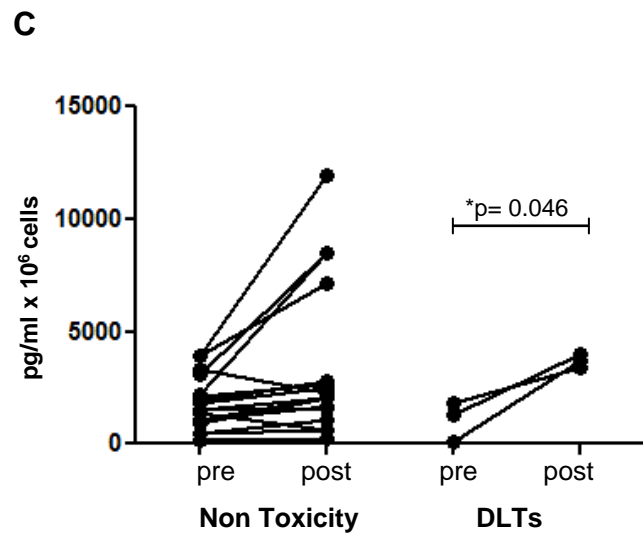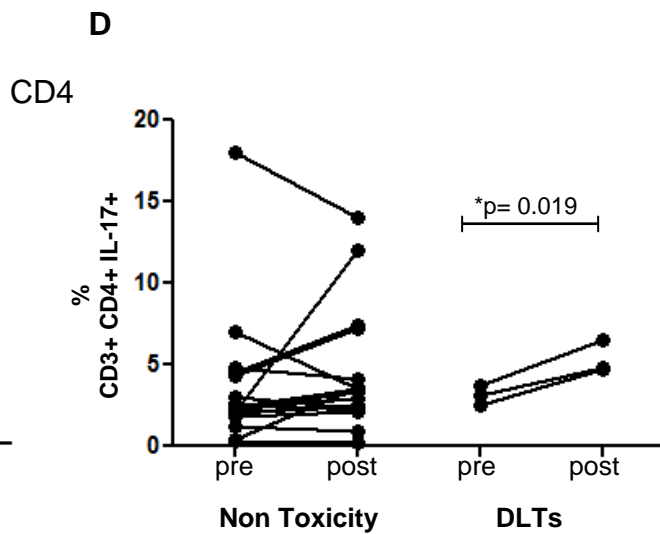

Supplement: MOESM4 [file 9576268]
